# Supplementary material for: Loss of the RNA-binding protein Rbm15 disrupts liver maturation in zebrafish
Source: PubMed Central journal article supplement (PMC7450140; doi:10.1074/jbc.ra120.014080), 2020-06-09
Supplement: supp_RA120.014080_160437_2_supp_544258_qbmg6g.pdf [file supp_RA120.014080_160437_2_supp_544258_qbmg6g.pdf]

## Supplemental Data

### Loss of the RNA-binding protein Rbm15 disrupts liver maturation in zebrafish

Liang Hu<sup>1</sup>, Hongyan Li<sup>1</sup>, Zhiping Chi<sup>1</sup>, and Jianbo He<sup>1\*</sup>

Supplementary Data:

Supplementary Figures: Figure S1 and S2

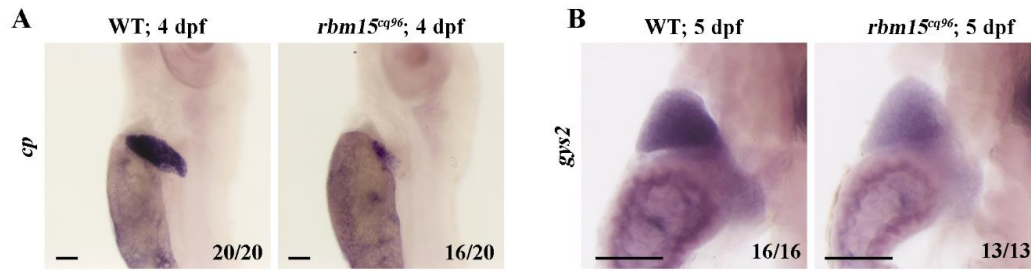

**Figure S1**

Supplemental Figure S1. **WISH result of *cp* and *gys2* in liver development.** **A.** WISH result of *cp* showing liver development of *rbm15<sup>cq96</sup>* at 4 dpf. **B.** WISH result of *gys2* at 5 dpf revealing glycogenesis of *rbm15<sup>cq96</sup>*. WT: wide type. Numbers indicate the proportion of larvae exhibiting the expression shown. Scale bars: 100 μm.

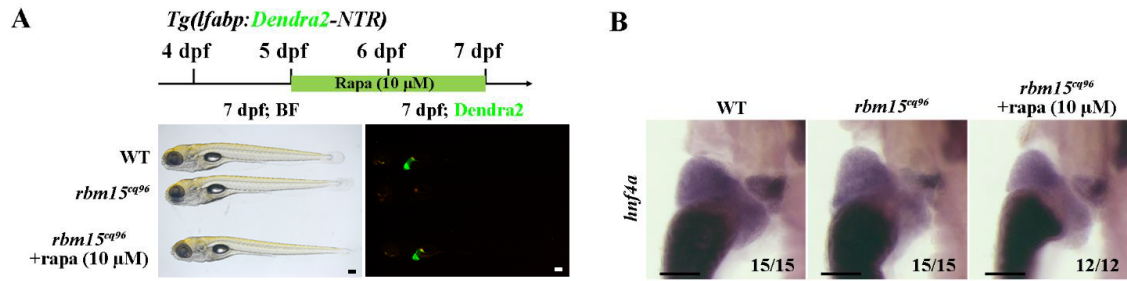

**Figure S2**

Supplemental Figure S2. **Rescue result of rapamycin treatment.** **A.** Rapamycin treatment strategy, and fluorescence images at 7 dpf. **B.** WISH result of *hnf4a* after rapamycin treatment showing the effect of rapamycin on the transcription level of *hnf4a*. BF: bright field. Numbers indicate the proportion of larvae exhibiting the expression shown. Rapa: rapamycin. Scale bars: 100  $\mu$ m.
